# Supplementary material
Source: PubMed Central journal article supplement (PMC3713107)
Supplement: NIHMS484741-supplement-251_2013_710_MOESM1_ESM.pdf [file NIHMS484741-supplement-251_2013_710_MOESM1_ESM.pdf]

**SUPPLEMENTAL FIGURE 1**

**&**

**SUPPLEMENTAL TABLES 1 - 2**

**Article Title:** Pathways analysis of differential gene expression induced by engrafting doses of total body irradiation for allogeneic bone marrow transplantation in mice

**Journal Name:** Immunogenetics

**Authors:** Xinjian Chen, Yuanyuan Wang, Qiuxia Li, Schickwann Tsai, Alun Thomas, Judith A. Shizuru, and Thai M. Cao

**Corresponding Author:** Thai M. Cao  
University of Utah  
thai.cao@hsc.utah.edu

## Supplemental Figure 1

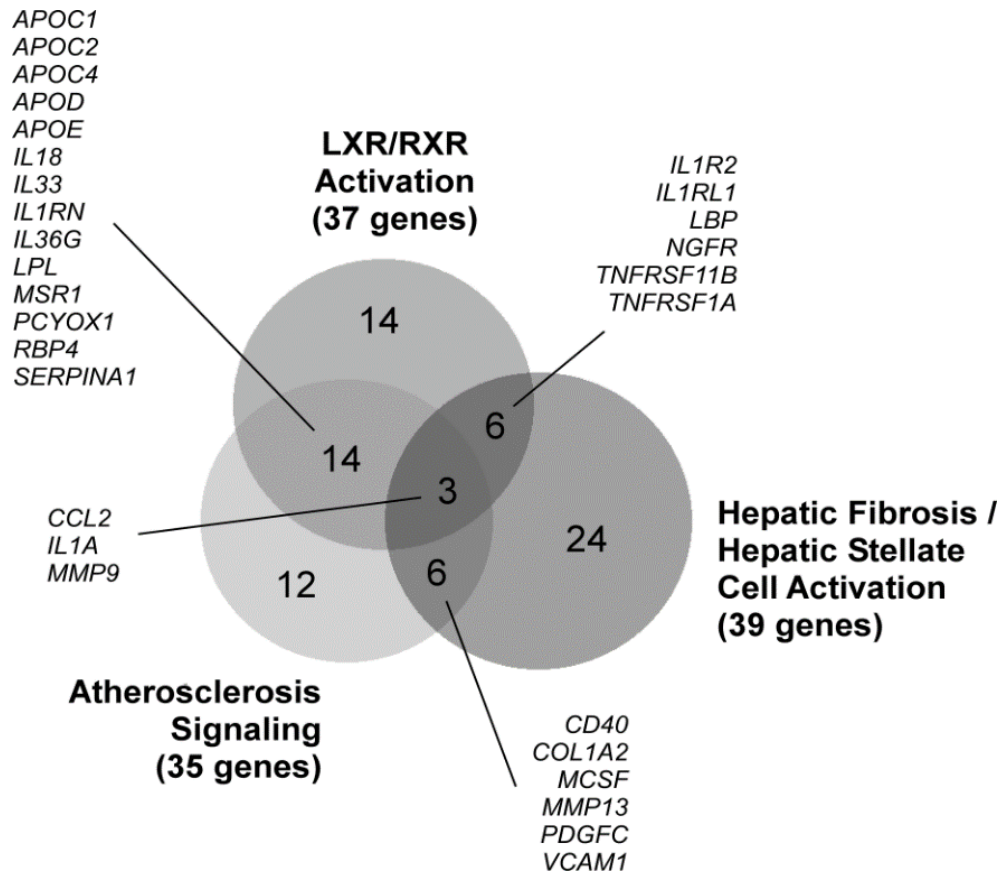

**Supplemental Fig. 1.** Three-way Venn-diagrams of genes enriched in the LXR/RXR activation, atherosclerosis signaling, and hepatic fibrosis / hepatic stellate cell activation canonical pathways.

---

**Supplemental Table 1. Real-time PCR primers.**

---

| <b>Primer</b>         | <b>Sequence (5' to 3')</b>      |
|-----------------------|---------------------------------|
| <b><i>H2-Ab1</i></b>  |                                 |
| Forward               | GCGACGTGGGCGAGTACC              |
| Reverse               | CATTCCGGAACCAGCGCA              |
| <b><i>H2-Oa</i></b>   |                                 |
| Forward               | AGACCAGCTTCTACTCTCAGCCTAAC      |
| Reverse               | ACAGATCAGGGTCTCTATGGTGTC        |
| <b><i>H2-Ob</i></b>   |                                 |
| Forward               | AGAGAATTTTGTGATTCAGGC           |
| Reverse               | TCTGGATACTACTGTCACCTCTG         |
| <b><i>H2-DMb1</i></b> |                                 |
| Forward               | TTGGGGTGCTGTATCCATGGGCCGAAAATT  |
| Reverse               | GAAGCCCCAGACGTAGCAGGCCAGCATCACC |
| <b><i>H2-DMb2</i></b> |                                 |
| Forward               | TTGGGGTGCTGTCTAGATTGGCTGAAATAA  |
| Reverse               | GAAGCCCCAGACGTAGCAGGCCAGCATCACG |
| <b><i>Cd80</i></b>    |                                 |
| Forward               | AAGTGGTGCTGTCTGTCATTG           |
| Reverse               | CGGAAGCAAAGCAGGTAATC            |

---

**Supplemental Table 2. Differentially expressed genes in canonical pathways shared between BALB.K and B10.BR mice in the spleen after conditioning with engrafting TBI doses. <sup>a</sup>**

| LXR/RXR Activation<br>(37 genes) |             | Complement System<br>(16 genes) |             | Atherosclerosis Signaling<br>(35 genes) |             | Hepatic Fibrosis / Hepatic Stellate<br>Cell Activation<br>(39 genes) |             | Heme Biosynthesis II<br>(8 genes) |             |
|----------------------------------|-------------|---------------------------------|-------------|-----------------------------------------|-------------|----------------------------------------------------------------------|-------------|-----------------------------------|-------------|
| Gene Symbol                      | Fold Change | Gene Symbol                     | Fold Change | Gene Symbol                             | Fold Change | Gene Symbol                                                          | Fold Change | Gene Symbol                       | Fold Change |
| ABCG1                            | ↑ 2.61      | C2                              | ↑ 2.80      | ALOXE3                                  | ↑ 2.02      | BAX                                                                  | ↑ 2.06      | ALAD                              | ↓ -6.34     |
| ABCG4                            | ↓ -57.13    | C3                              | ↑ 2.36      | APOC1                                   | ↑ 4.65      | CCL2                                                                 | ↑ 9.90      | ALAS2                             | ↓ -4.12     |
| AHSG                             | ↓ -3.07     | C6                              | ↑ 4.27      | APOC2                                   | ↑ 3.32      | CD40                                                                 | ↓ -2.36     | CPOX                              | ↓ -7.62     |
| APOC1                            | ↑ 4.65      | C1QA                            | ↑ 3.39      | APOC4                                   | ↑ 2.13      | COL1A2                                                               | ↑ 2.13      | FECH                              | ↓ -3.99     |
| APOC2                            | ↑ 3.32      | C1QB                            | ↑ 3.67      | APOD                                    | ↑ 3.95      | EDNRA                                                                | ↑ 2.44      | HMBS                              | ↓ -12.52    |
| APOC4                            | ↑ 2.13      | C1QC                            | ↑ 2.81      | APOE                                    | ↑ 2.29      | EDNRB                                                                | ↑ 3.28      | PPOX                              | ↓ -3.19     |
| APOD                             | ↑ 3.95      | C1R                             | ↑ 3.10      | CCL11                                   | ↑ 9.90      | EGFR                                                                 | ↑ 2.69      | UROD                              | ↓ -6.20     |
| APOE                             | ↑ 2.29      | C1S                             | ↑ 3.09      | CCL2                                    | ↑ 2.70      | FGFR1                                                                | ↑ 2.51      | UROS                              | ↓ -8.63     |
| APOH                             | ↑ 4.29      | C4B                             | ↑ 3.40      | CD40                                    | ↓ -2.36     | FLT1                                                                 | ↑ 2.38      |                                   |             |
| ARG2                             | ↑ 3.25      | C5AR1                           | ↑ 2.26      | COL18A1                                 | ↑ 2.27      | FLT4                                                                 | ↑ 2.10      |                                   |             |
| C3                               | ↑ 2.36      | CD59                            | ↓ -7.45     | COL1A2                                  | ↑ 2.13      | HGF                                                                  | ↑ 2.80      |                                   |             |
| C4B                              | ↑ 3.40      | CFB                             | ↑ 2.38      | IL18                                    | ↑ 2.12      | IGF1                                                                 | ↑ 2.73      |                                   |             |
| CCL2                             | ↑ 9.90      | CFH                             | ↑ 2.53      | IL1A                                    | ↑ 2.39      | IGFBP3                                                               | ↑ 3.29      |                                   |             |
| FDFT1                            | ↑ 2.16      | CFI                             | ↑ 4.07      | IL1RN                                   | ↑ 2.22      | IGFBP4                                                               | ↑ 2.57      |                                   |             |
| IL18                             | ↑ 2.12      | CR2                             | ↓ -2.43     | IL33                                    | ↑ 2.22      | IGFBP5                                                               | ↑ 2.34      |                                   |             |
| IL33                             | ↑ 2.39      | SERPING1                        | ↑ 3.07      | IL36G                                   | ↑ 2.32      | IL1A                                                                 | ↑ 2.32      |                                   |             |
| IL1A                             | ↑ 2.22      |                                 |             | ITGA4                                   | ↓ -2.50     | IL1R2                                                                | ↑ 2.22      |                                   |             |
| IL1R2                            | ↑ 4.80      |                                 |             | LPL                                     | ↑ 2.72      | IL1RL1                                                               | ↑ 4.80      |                                   |             |
| IL1RL1                           | ↓ -14.24    |                                 |             | MCSF                                    | ↑ 2.32      | IL4                                                                  | ↓ -14.24    |                                   |             |
| IL1RN                            | ↑ 2.22      |                                 |             | MMP13                                   | ↑ 11.54     | KDR                                                                  | ↑ 2.02      |                                   |             |
| IL36G                            | ↑ 2.32      |                                 |             | MMP3                                    | ↑ 2.07      | LBP                                                                  | ↑ 2.61      |                                   |             |
| ITIH4                            | ↑ 3.94      |                                 |             | MMP9                                    | ↑ 6.19      | LEPR                                                                 | ↑ 3.35      |                                   |             |
| KNG1                             | ↑ 2.18      |                                 |             | MSR1                                    | ↑ 4.56      | MCSF                                                                 | ↑ 2.32      |                                   |             |
| LBP                              | ↑ 2.61      |                                 |             | PCYOX1                                  | ↑ 2.27      | MMP13                                                                | ↑ 7.41      |                                   |             |
| LPL                              | ↑ 2.72      |                                 |             | PDGFC                                   | ↑ 4.22      | MMP2                                                                 | ↑ 2.07      |                                   |             |
| MMP9                             | ↑ 2.07      |                                 |             | PLA2G1B                                 | ↑ 3.53      | MMP9                                                                 | ↑ 6.19      |                                   |             |
| MSR1                             | ↑ 4.56      |                                 |             | PLA2G2C                                 | ↓ -3.57     | MYH11                                                                | ↑ 6.85      |                                   |             |
| NGFR                             | ↑ 2.88      |                                 |             | PLA2G2D                                 | ↑ 3.56      | MYH7                                                                 | ↑ 2.47      |                                   |             |
| NR1H3                            | ↑ 2.29      |                                 |             | PLA2G4F                                 | ↑ 2.28      | NGFR                                                                 | ↑ 2.88      |                                   |             |
| PCYOX1                           | ↑ 2.27      |                                 |             | PLA2G7                                  | ↑ 5.12      | PDGFC                                                                | ↑ 4.22      |                                   |             |
| PON3                             | ↑ 2.10      |                                 |             | RBP4                                    | ↑ 2.83      | PDGFRA                                                               | ↑ 3.04      |                                   |             |
| RBP4                             | ↑ 2.83      |                                 |             | SELP                                    | ↑ 2.20      | PDGFRB                                                               | ↑ 2.26      |                                   |             |
| SAA2                             | ↑ 26.88     |                                 |             | SERPINA1                                | ↑ 2.43      | PGF                                                                  | ↑ 2.77      |                                   |             |
| SERPINA1                         | ↑ 2.43      |                                 |             | TNFSF12                                 | ↑ 2.53      | STAT1                                                                | ↑ 2.62      |                                   |             |
| TF                               | ↑ 2.22      |                                 |             | VCAM1                                   | ↑ 3.93      | TIMP1                                                                | ↑ 2.47      |                                   |             |
| TNFRSF11B                        | ↑ 2.00      |                                 |             |                                         |             | TIMP2                                                                | ↑ 3.16      |                                   |             |
| TNFRSF1A                         | ↑ 2.38      |                                 |             |                                         |             | TNFRSF11B                                                            | ↑ 2.00      |                                   |             |
|                                  |             |                                 |             |                                         |             | TNFRSF1A                                                             | ↑ 2.38      |                                   |             |
|                                  |             |                                 |             |                                         |             | VCAM1                                                                | ↑ 3.93      |                                   |             |

Abbreviations: IPA, Ingenuity Pathways Analysis; TBI, total body irradiation.

<sup>a</sup> TBI doses were 400 cGy for BALB.K and 500 cGy for B10.BR mice.

**Supplemental Table 2 (Continued). Differentially expressed genes in canonical pathways shared between BALB.K and B10.BR mice in the spleen after conditioning with engrafting TBI doses. <sup>a</sup>**

| B Cell Development<br>(13 genes) |             | Altered T Cell and B Cell Signaling<br>in Rheumatoid Arthritis<br>(21 genes) |             | Matrix Metalloproteases<br>(13 genes) |             | Heme Biosynthesis from<br>Uroporphyrinogen-III I<br>(4 genes) |             | Communication between Innate<br>and Adaptive Immune Cells<br>(18 genes) |             |
|----------------------------------|-------------|------------------------------------------------------------------------------|-------------|---------------------------------------|-------------|---------------------------------------------------------------|-------------|-------------------------------------------------------------------------|-------------|
| Gene Symbol                      | Fold Change | Gene Symbol                                                                  | Fold Change | Gene Symbol                           | Fold Change | Gene Symbol                                                   | Fold Change | Gene Symbol                                                             | Fold Change |
| CD19                             | ↓ -2.95     | CD40                                                                         | ↓ -2.36     | HSGP2                                 | ↑ 2.11      | CPOX                                                          | ↓ -7.62     | CD40                                                                    | ↓ -2.36     |
| CD40                             | ↓ -2.36     | CD80                                                                         | ↑ 2.29      | LRP1                                  | ↑ 3.53      | FECH                                                          | ↓ -3.99     | CD80                                                                    | ↑ 2.29      |
| CD43                             | ↓ -2.38     | CD79A                                                                        | ↓ -2.88     | MMP2                                  | ↑ 7.41      | PPOX                                                          | ↓ -3.19     | CD8A                                                                    | ↓ -2.78     |
| CD80                             | ↑ 2.29      | CD79B                                                                        | ↓ -2.62     | MMP3                                  | ↑ 11.54     | UROD                                                          | ↓ -6.20     | CD8B                                                                    | ↓ -5.17     |
| CD79A                            | ↓ -2.88     | FCER1G                                                                       | ↑ 2.44      | MMP9                                  | ↑ 2.07      |                                                               |             | CXCL10                                                                  | ↑ 3.39      |
| CD79B                            | ↓ -2.62     | H2-DMB2                                                                      | ↓ -2.75     | MMP13                                 | ↑ 6.19      |                                                               |             | FCER1G                                                                  | ↑ 2.44      |
| DNTT                             | ↓ -2.77     | H2-OA                                                                        | ↓ -2.01     | MMP14                                 | ↑ 2.40      |                                                               |             | IL4                                                                     | ↑ 2.32      |
| H2-DMB2                          | ↓ -2.75     | H2-OB                                                                        | ↓ -3.92     | MMP15                                 | ↑ 2.39      |                                                               |             | IL15                                                                    | ↑ 3.18      |
| H2-OA                            | ↓ -2.01     | IL4                                                                          | ↑ 2.32      | MMP25                                 | ↑ 2.81      |                                                               |             | IL18                                                                    | ↑ 2.12      |
| H2-OB                            | ↓ -3.92     | IL15                                                                         | ↑ 3.18      | SDC2                                  | ↑ 2.24      |                                                               |             | IL33                                                                    | ↑ 2.39      |
| IGKC                             | ↓ -2.58     | IL18                                                                         | ↑ 2.12      | THBS2                                 | ↑ 3.09      |                                                               |             | IL12B                                                                   | ↑ 2.43      |
| IL7                              | ↑ 2.53      | IL33                                                                         | ↑ 2.39      | TIMP1                                 | ↑ 2.47      |                                                               |             | IL1A                                                                    | ↑ 2.22      |
| RAG1                             | ↓ -3.62     | IL12B                                                                        | ↑ 2.43      | TIMP2                                 | ↑ 3.16      |                                                               |             | IL1RN                                                                   | ↑ 2.22      |
|                                  |             | IL1A                                                                         | ↑ 2.22      |                                       |             |                                                               |             | IIL36G                                                                  | ↑ 2.32      |
|                                  |             | IL1RN                                                                        | ↑ 2.22      |                                       |             |                                                               |             | TLR7                                                                    | ↑ 2.64      |
|                                  |             | IL36G                                                                        | ↑ 2.32      |                                       |             |                                                               |             | Tlr13                                                                   | ↑ 2.27      |
|                                  |             | MCSF                                                                         | ↑ 2.32      |                                       |             |                                                               |             | TNFRSF13C                                                               | ↓ -3.35     |
|                                  |             | TLR7                                                                         | ↑ 2.64      |                                       |             |                                                               |             | TNFSF13B                                                                | ↑ 3.59      |
|                                  |             | Tlr13                                                                        | ↑ 2.27      |                                       |             |                                                               |             |                                                                         |             |
|                                  |             | RNFRSF13C                                                                    | ↓ -3.35     |                                       |             |                                                               |             |                                                                         |             |
|                                  |             | TNFS13B                                                                      | ↑ 3.59      |                                       |             |                                                               |             |                                                                         |             |

Abbreviations: IPA, Ingenuity Pathways Analysis; TBI, total body irradiation.

<sup>a</sup> TBI doses were 400 cGy for BALB.K and 500 cGy for B10.BR mice.
